# Supplementary material for: A comprehensive filtering scheme for high-resolution estimation of the water balance components from high-precision lysimeters
Source: Copernicus journal article supplement (doi:10.5194/hess-19-3405-2015), 2015-08-04
Supplement: Supplementary file 1 [file hess-19-3405-2015-supplement.zip]

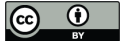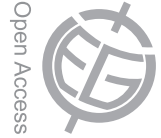

## *Supplement of*

# **A comprehensive filtering scheme for high-resolution estimation of the water balance components from high-precision lysimeters**

**M. Hannes et al.**

*Correspondence to:* M. Hannes (matthias.hannes@ufz.de)

- hess-19-3405-2015-supplement-title-page.pdf
- waterbalance\_vs12\_opensource
  - Linux
    - \* Info.txt
    - \* \_getwaterbalance
    - \* disclaimer.txt
    - \* input
    - \* output
    - \* param.dat
    - \* plottingexamples
    - \* source
  - Windows
    - \* Info.txt
    - \* disclaimer.txt
    - \* getwaterbalance.exe
    - \* input
    - \* output
    - \* param.dat
    - \* plottingexamples
    - \* source

The copyright of individual parts of the supplement might differ from the CC-BY 3.0 licence.
